# Supplementary material
Source: publisher figshare collection journal article supplement (https://adisjournals.figshare.com/articles/dataset/_/6015776)

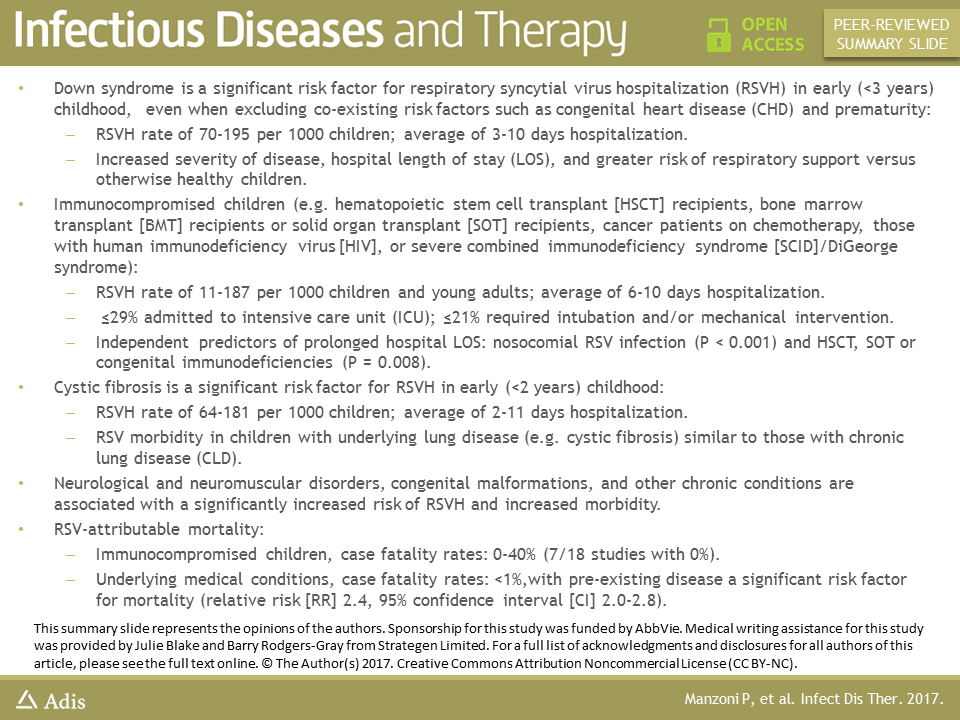

Supplement: Supplementary file 1 [file 1 › Summary Slide.png]
